# Supplementary material for: Comparative Analysis of Cell–Cell Contact Abundance in Ovarian Carcinoma Cells Cultured in Two- and Three-Dimensional In Vitro Models
Source: PubMed Central journal article supplement (PMC7761996; doi:10.3390/biology9120446), 2020-12-04
Supplement: biology-09-00446-s001.pdf [file biology-09-00446-s001.pdf]

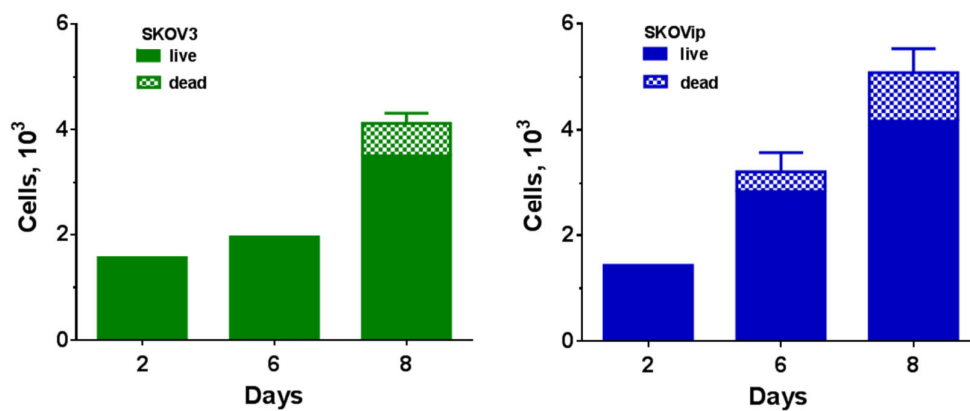

**Figure S1.** Viability of cells within the formed spheroids SKOV3 and SKOV3ip. Spheroids of both cell lines at days 2, 6, and 9 were disaggregated, the resulting cell suspension was stained with 0.4% trypan blue solution, and the number of living / dead cells was counted with hemocytometer.
